# Supplementary material for: Isotope exchange reaction in tritium-contaminated vacuum pump oil: mechanism and HTO effect
Source: Royal Society of Chemistry journal article supplement (doi:10.1039/c6ra25404g), 2017-01-01
Supplement: c6ra25404g1.pdf [file c6ra25404g1.pdf]

## Electronic Supplementary Information

### Isotope Exchange Reaction in Tritium-contaminated Vacuum Pump Oil: Mechanism and HTO's Effect

Liang Dong,<sup>a</sup> Na Yang,<sup>a</sup> Yong Yang,<sup>a</sup> Weiyi Li,<sup>c</sup> Yi Quan,<sup>a</sup> Bing Deng,<sup>a</sup>  
Dan Meng,<sup>a</sup> Yang Du,<sup>\*,a</sup> Shuo Li,<sup>\*,b</sup> Zhaoyi Tan<sup>\*,a,d</sup>

<sup>a</sup> Institute of Nuclear Physics and Chemistry, China Academy of Engineering Physics, Mianyang, 621900, P. R. China

<sup>b</sup> School of Chemical Engineering, Chongqing University of Technology, Chongqing, 400054, P. R. China

<sup>c</sup> School of Physics and Chemistry, Xihua University, Chengdu, 610065, P. R. China

<sup>d</sup> School of Radiation Medicine and Protection (SRMP), School for Radiological and Interdisciplinary Sciences (RAD-X), Suzhou, 215000, P. R. China

AUTHOR EMAIL ADDRESS: [zhyitan@126.com](mailto:zhyitan@126.com); [tanzhaoyi@caep.cn](mailto:tanzhaoyi@caep.cn)

HTO:

Input orientation:

| Center<br>Number | Atomic<br>Number | Atomic<br>Type | Coordinates (Angstroms) |           |          |
|------------------|------------------|----------------|-------------------------|-----------|----------|
|                  |                  |                | X                       | Y         | Z        |
| 1                | 1                | 0              | -1.221459               | -0.746227 | 0.219425 |
| 2                | 8                | 0              | -1.427490               | -1.077315 | 1.095694 |
| 3                | 1                | 0              | -1.836136               | -1.932500 | 0.948183 |

Zero-point Energies= -76.403385 au

H<sub>2</sub>O:

Input orientation:

| Center<br>Number | Atomic<br>Number | Atomic<br>Type | Coordinates (Angstroms) |           |          |
|------------------|------------------|----------------|-------------------------|-----------|----------|
|                  |                  |                | X                       | Y         | Z        |
| 1                | 1                | 0              | -1.221459               | -0.746227 | 0.219425 |
| 2                | 8                | 0              | -1.427490               | -1.077315 | 1.095694 |
| 3                | 1                | 0              | -1.836136               | -1.932500 | 0.948183 |

Zero-point Energies= -76.399270 au

CH<sub>4</sub>:

Input orientation:

| Center<br>Number | Atomic<br>Number | Atomic<br>Type | Coordinates (Angstroms) |           |           |
|------------------|------------------|----------------|-------------------------|-----------|-----------|
|                  |                  |                | X                       | Y         | Z         |
| 1                | 6                | 0              | -0.099261               | -0.166720 | 0.179993  |
| 2                | 1                | 0              | 0.194287                | 0.669275  | -0.453295 |
| 3                | 1                | 0              | -0.912891               | -0.713313 | -0.294862 |
| 4                | 1                | 0              | 0.751341                | -0.832012 | 0.320953  |
| 5                | 1                | 0              | -0.430552               | 0.209276  | 1.146948  |

Zero-point Energies= -40.451869 au

TS<sub>CH4-HTO</sub>:

Input orientation:

| Center<br>Number | Atomic<br>Number | Atomic<br>Type | Coordinates (Angstroms) |           |           |
|------------------|------------------|----------------|-------------------------|-----------|-----------|
|                  |                  |                | X                       | Y         | Z         |
| 1                | 6                | 0              | -0.024503               | -0.179398 | 0.122422  |
| 2                | 1                | 0              | 0.409317                | 1.096239  | -0.407830 |
| 3                | 1                | 0              | -0.682681               | -0.787206 | -0.498108 |
| 4                | 1                | 0              | 0.622674                | -0.817098 | 0.726687  |
| 5                | 1                | 0              | -0.650501               | 0.378659  | 0.827089  |
| 6                | 1                | 0              | 1.005031                | 0.301880  | -0.789527 |
| 7                | 8                | 0              | 1.368913                | 1.443401  | -1.134380 |
| 8                | 1                | 0              | 1.138119                | 1.701807  | -2.035065 |

Zero-point Energies= -116.735050 au

TS<sub>CH4-2HTO-1</sub>:

Input orientation:

| Center<br>Number | Atomic<br>Number | Atomic<br>Type | Coordinates (Angstroms) |   |   |
|------------------|------------------|----------------|-------------------------|---|---|
|                  |                  |                | X                       | Y | Z |

|    |   |   |           |           |           |
|----|---|---|-----------|-----------|-----------|
| 1  | 6 | 0 | 0.052730  | -0.175659 | 0.123296  |
| 2  | 1 | 0 | -0.978396 | 0.088694  | -0.135512 |
| 3  | 1 | 0 | 0.099899  | -1.258472 | -0.035114 |
| 4  | 1 | 0 | 0.184783  | 0.010063  | 1.192197  |
| 5  | 1 | 0 | 0.429804  | 1.028040  | -0.648901 |
| 6  | 8 | 0 | 0.906960  | 1.886152  | -1.306770 |
| 7  | 1 | 0 | 1.877840  | 1.174653  | -1.350589 |
| 8  | 8 | 0 | 2.355254  | 0.084951  | -1.163756 |
| 9  | 1 | 0 | 3.137141  | 0.055651  | -0.606323 |
| 10 | 1 | 0 | 1.365136  | -0.135933 | -0.557405 |
| 11 | 1 | 0 | 1.007248  | 2.706660  | -0.817520 |

-----  
 Zero-point Energies= -193.175607 au

TS<sub>CH3T</sub> (TS<sub>CH4-2HTO-2</sub>):

Input orientation:

| Center<br>Number | Atomic<br>Number | Atomic<br>Type | Coordinates (Angstroms) |           |           |
|------------------|------------------|----------------|-------------------------|-----------|-----------|
|                  |                  |                | X                       | Y         | Z         |
| 1                | 6                | 0              | 0.016807                | -0.158654 | 0.108142  |
| 2                | 1                | 0              | -0.869203               | -0.449787 | -0.461431 |
| 3                | 1                | 0              | 0.448324                | -1.087410 | 0.499976  |
| 4                | 1                | 0              | -0.306453               | 0.394417  | 0.995388  |
| 5                | 1                | 0              | 0.419218                | 1.108590  | -0.534933 |
| 6                | 8                | 0              | 0.906753                | 2.029911  | -1.088637 |
| 7                | 1                | 0              | 0.361423                | 2.341812  | -1.815800 |
| 8                | 1                | 0              | 1.762471                | 1.246287  | -1.403781 |
| 9                | 8                | 0              | 2.209810                | 0.130631  | -1.355899 |
| 10               | 1                | 0              | 3.048379                | 0.050272  | -0.893584 |
| 11               | 1                | 0              | 1.288671                | -0.102769 | -0.653740 |

-----  
 Zero-point Energies= -193.176909 au

CH<sub>3</sub>T:

Input orientation:

| Center<br>Number | Atomic<br>Number | Atomic<br>Type | Coordinates (Angstroms) |           |           |
|------------------|------------------|----------------|-------------------------|-----------|-----------|
|                  |                  |                | X                       | Y         | Z         |
| 1                | 6                | 0              | -0.099261               | -0.166720 | 0.179993  |
| 2                | 1                | 0              | 0.194287                | 0.669275  | -0.453295 |
| 3                | 1                | 0              | -0.912891               | -0.713313 | -0.294862 |
| 4                | 1                | 0              | 0.751341                | -0.832012 | 0.320953  |
| 5                | 1                | 0              | -0.430552               | 0.209276  | 1.146948  |

-----  
 Zero-point Energies= -40.456003 au

C<sub>2</sub>H<sub>6</sub>:

Input orientation:

| Center<br>Number | Atomic<br>Number | Atomic<br>Type | Coordinates (Angstroms) |           |           |
|------------------|------------------|----------------|-------------------------|-----------|-----------|
|                  |                  |                | X                       | Y         | Z         |
| 1                | 6                | 0              | -0.758675               | 0.073450  | -0.000337 |
| 2                | 6                | 0              | 0.768100                | 0.055475  | 0.000361  |
| 3                | 1                | 0              | -1.144144               | 0.934447  | 0.549363  |
| 4                | 1                | 0              | -1.165063               | -0.826287 | 0.465783  |
| 5                | 1                | 0              | 1.174488                | 0.955199  | -0.465783 |
| 6                | 1                | 0              | 1.153569                | -0.805537 | -0.549315 |
| 7                | 1                | 0              | -1.153068               | 0.126427  | -1.017011 |
| 8                | 1                | 0              | 1.162492                | 0.002526  | 1.017037  |

-----  
Zero-point Energies= -79.722272 au

TS<sub>C<sub>2</sub>H<sub>5</sub>T</sub>:

Input orientation:

| Center<br>Number | Atomic<br>Number | Atomic<br>Type | Coordinates (Angstroms) |           |           |
|------------------|------------------|----------------|-------------------------|-----------|-----------|
|                  |                  |                | X                       | Y         | Z         |
| 1                | 6                | 0              | -0.478641               | 0.723861  | -0.598269 |
| 2                | 6                | 0              | 1.035164                | 0.857952  | -0.794668 |
| 3                | 1                | 0              | -0.893919               | 1.646911  | -0.175887 |
| 4                | 1                | 0              | 1.307778                | 1.711100  | -1.420924 |
| 5                | 1                | 0              | 1.451912                | -0.036315 | -1.267412 |
| 6                | 1                | 0              | -0.991644               | 0.631249  | -1.562913 |
| 7                | 1                | 0              | 1.542480                | 0.977547  | 0.166048  |
| 8                | 1                | 0              | -0.703584               | 0.159834  | 0.705864  |
| 9                | 8                | 0              | -0.744394               | -0.488323 | 1.733753  |
| 10               | 1                | 0              | -1.495905               | -0.267003 | 2.289631  |
| 11               | 1                | 0              | -0.920234               | -1.415864 | 0.986651  |
| 12               | 8                | 0              | -1.019235               | -1.827465 | -0.137953 |
| 13               | 1                | 0              | -0.798400               | -0.670729 | -0.441241 |
| 14               | 1                | 0              | -0.320279               | -2.429154 | -0.406378 |

-----  
Zero-point Energies= -232.446321 au

C<sub>2</sub>H<sub>5</sub>T:

Input orientation:

| Center<br>Number | Atomic<br>Number | Atomic<br>Type | Coordinates (Angstroms) |           |           |
|------------------|------------------|----------------|-------------------------|-----------|-----------|
|                  |                  |                | X                       | Y         | Z         |
| 1                | 6                | 0              | -0.758675               | 0.073450  | -0.000337 |
| 2                | 6                | 0              | 0.768100                | 0.055475  | 0.000361  |
| 3                | 1                | 0              | -1.144144               | 0.934447  | 0.549363  |
| 4                | 1                | 0              | -1.165063               | -0.826287 | 0.465783  |
| 5                | 1                | 0              | 1.174488                | 0.955199  | -0.465783 |
| 6                | 1                | 0              | 1.153569                | -0.805537 | -0.549315 |
| 7                | 1                | 0              | -1.153068               | 0.126427  | -1.017011 |
| 8                | 1                | 0              | 1.162492                | 0.002526  | 1.017037  |

-----  
Zero-point Energies= -79.726755 au

C<sub>3</sub>H<sub>8</sub>:

Input orientation:

| Center<br>Number | Atomic<br>Number | Atomic<br>Type | Coordinates (Angstroms) |           |           |
|------------------|------------------|----------------|-------------------------|-----------|-----------|
|                  |                  |                | X                       | Y         | Z         |
| 1                | 6                | 0              | -1.458518               | 0.175838  | -0.078221 |
| 2                | 6                | 0              | -0.086086               | -0.493140 | -0.064754 |
| 3                | 6                | 0              | 1.039392                | 0.510333  | 0.176698  |
| 4                | 1                | 0              | -1.515548               | 0.929500  | -0.868333 |
| 5                | 1                | 0              | -2.258554               | -0.547956 | -0.246221 |
| 6                | 1                | 0              | -1.653914               | 0.678589  | 0.872836  |
| 7                | 1                | 0              | 0.079839                | -1.007639 | -1.015960 |
| 8                | 1                | 0              | -0.061621               | -1.263626 | 0.711737  |
| 9                | 1                | 0              | 0.906594                | 1.017741  | 1.136046  |
| 10               | 1                | 0              | 2.017474                | 0.025127  | 0.186253  |
| 11               | 1                | 0              | 1.051142                | 1.275832  | -0.603882 |

Zero-point Energies= -118.997039 au

TS<sub>CH3-CH2-CH2T</sub>:

Input orientation:

| Center<br>Number | Atomic<br>Number | Atomic<br>Type | Coordinates (Angstroms) |           |           |
|------------------|------------------|----------------|-------------------------|-----------|-----------|
|                  |                  |                | X                       | Y         | Z         |
| 1                | 6                | 0              | -1.490777               | 0.139264  | -0.133559 |
| 2                | 6                | 0              | -0.101739               | -0.511459 | -0.101270 |
| 3                | 6                | 0              | 0.981323                | 0.491847  | 0.294011  |
| 4                | 1                | 0              | -1.506478               | 0.897607  | -0.929000 |
| 5                | 1                | 0              | -2.268180               | -0.574957 | -0.425273 |
| 6                | 1                | 0              | 0.148045                | -0.952445 | -1.071714 |
| 7                | 1                | 0              | -0.101443               | -1.342858 | 0.613913  |
| 8                | 1                | 0              | 0.772348                | 0.932622  | 1.273161  |
| 9                | 1                | 0              | 1.968809                | 0.027168  | 0.333881  |
| 10               | 1                | 0              | 1.025213                | 1.314842  | -0.424831 |
| 11               | 1                | 0              | -1.684024               | 1.327113  | 0.691122  |
| 12               | 8                | 0              | -1.766630               | 2.181063  | 1.547491  |
| 13               | 1                | 0              | -2.508350               | 2.777239  | 1.414636  |
| 14               | 1                | 0              | -1.991905               | 1.262707  | 2.277935  |
| 15               | 8                | 0              | -2.121635               | 0.068427  | 2.432725  |
| 16               | 1                | 0              | -1.446717               | -0.345167 | 2.977151  |
| 17               | 1                | 0              | -1.859060               | 0.028486  | 1.250423  |

Zero-point Energies= -271.722045 au

CH<sub>3</sub>-CH<sub>2</sub>-CH<sub>2</sub>T:

Input orientation:

| Center<br>Number | Atomic<br>Number | Atomic<br>Type | Coordinates (Angstroms) |           |           |
|------------------|------------------|----------------|-------------------------|-----------|-----------|
|                  |                  |                | X                       | Y         | Z         |
| 1                | 6                | 0              | -1.458518               | 0.175838  | -0.078221 |
| 2                | 6                | 0              | -0.086086               | -0.493140 | -0.064754 |
| 3                | 6                | 0              | 1.039392                | 0.510333  | 0.176698  |
| 4                | 1                | 0              | -1.515548               | 0.929500  | -0.868333 |
| 5                | 1                | 0              | -2.258554               | -0.547956 | -0.246221 |
| 6                | 1                | 0              | -1.653914               | 0.678589  | 0.872836  |
| 7                | 1                | 0              | 0.079839                | -1.007639 | -1.015960 |
| 8                | 1                | 0              | -0.061621               | -1.263626 | 0.711737  |
| 9                | 1                | 0              | 0.906594                | 1.017741  | 1.136046  |
| 10               | 1                | 0              | 2.017474                | 0.025127  | 0.186253  |
| 11               | 1                | 0              | 1.051142                | 1.275832  | -0.603882 |

Zero-point Energies= -119.001507 au

TS<sub>CH3-CHT-CH3</sub>:

Input orientation:

| Center<br>Number | Atomic<br>Number | Atomic<br>Type | Coordinates (Angstroms) |           |           |
|------------------|------------------|----------------|-------------------------|-----------|-----------|
|                  |                  |                | X                       | Y         | Z         |
| 1                | 1                | 0              | 0.206890                | -1.324976 | -1.170052 |
| 2                | 6                | 0              | -1.483550               | 0.361734  | -0.058729 |
| 3                | 6                | 0              | -0.116576               | -0.319883 | -0.198100 |
| 4                | 6                | 0              | 1.024236                | 0.561550  | 0.316497  |
| 5                | 1                | 0              | -1.511854               | 1.295567  | -0.630370 |
| 6                | 1                | 0              | -2.290285               | -0.278350 | -0.424691 |
| 7                | 1                | 0              | -1.702319               | 0.614547  | 0.983522  |
| 8                | 1                | 0              | -0.150366               | -1.229226 | 0.417991  |

|    |   |   |           |           |           |
|----|---|---|-----------|-----------|-----------|
| 9  | 1 | 0 | 0.877000  | 0.842964  | 1.364260  |
| 10 | 1 | 0 | 1.990570  | 0.056268  | 0.239058  |
| 11 | 1 | 0 | 1.091060  | 1.483923  | -0.268186 |
| 12 | 8 | 0 | 0.448155  | -2.068587 | -2.130919 |
| 13 | 1 | 0 | 1.323189  | -2.463988 | -2.106818 |
| 14 | 1 | 0 | 0.382993  | -1.066375 | -2.759913 |
| 15 | 1 | 0 | -0.596229 | 0.423917  | -3.252435 |
| 16 | 8 | 0 | 0.189709  | 0.140658  | -2.779116 |
| 17 | 1 | 0 | -0.005822 | -0.050442 | -1.574098 |

-----  
 Zero-point Energies= -271.719887 au

CH<sub>3</sub>-CHT-CH<sub>3</sub>:

Input orientation:

| Center<br>Number | Atomic<br>Number | Atomic<br>Type | Coordinates (Angstroms) |           |           |
|------------------|------------------|----------------|-------------------------|-----------|-----------|
|                  |                  |                | X                       | Y         | Z         |
| 1                | 6                | 0              | -1.458518               | 0.175838  | -0.078221 |
| 2                | 6                | 0              | -0.086086               | -0.493140 | -0.064754 |
| 3                | 6                | 0              | 1.039392                | 0.510333  | 0.176698  |
| 4                | 1                | 0              | -1.515548               | 0.929500  | -0.868333 |
| 5                | 1                | 0              | -2.258554               | -0.547956 | -0.246221 |
| 6                | 1                | 0              | -1.653914               | 0.678589  | 0.872836  |
| 7                | 1                | 0              | 0.079839                | -1.007639 | -1.015960 |
| 8                | 1                | 0              | -0.061621               | -1.263626 | 0.711737  |
| 9                | 1                | 0              | 0.906594                | 1.017741  | 1.136046  |
| 10               | 1                | 0              | 2.017474                | 0.025127  | 0.186253  |
| 11               | 1                | 0              | 1.051142                | 1.275832  | -0.603882 |

-----  
 Zero-point Energies= -119.001744 au

C<sub>2</sub>H<sub>4</sub>:

Input orientation:

| Center<br>Number | Atomic<br>Number | Atomic<br>Type | Coordinates (Angstroms) |           |          |
|------------------|------------------|----------------|-------------------------|-----------|----------|
|                  |                  |                | X                       | Y         | Z        |
| 1                | 6                | 0              | -0.929077               | 0.080310  | 0.000000 |
| 2                | 6                | 0              | 0.396177                | 0.045190  | 0.000000 |
| 3                | 1                | 0              | -1.472755               | 1.018309  | 0.000000 |
| 4                | 1                | 0              | -1.521478               | -0.827843 | 0.000000 |
| 5                | 1                | 0              | 0.988578                | 0.953343  | 0.000000 |
| 6                | 1                | 0              | 0.939855                | -0.892809 | 0.000000 |

-----  
 Zero-point Energies= -78.512292 au

TS<sub>C<sub>2</sub>H<sub>3</sub>T</sub>:

Input orientation:

| Center<br>Number | Atomic<br>Number | Atomic<br>Type | Coordinates (Angstroms) |           |           |
|------------------|------------------|----------------|-------------------------|-----------|-----------|
|                  |                  |                | X                       | Y         | Z         |
| 1                | 6                | 0              | -1.289763               | 0.409062  | 0.009034  |
| 2                | 6                | 0              | 0.026565                | 0.290036  | -0.202145 |
| 3                | 1                | 0              | -1.978928               | -0.387632 | -0.269160 |
| 4                | 1                | 0              | -1.752567               | 1.281170  | 0.468538  |
| 5                | 1                | 0              | 0.643295                | 1.131975  | 0.117571  |
| 6                | 1                | 0              | 0.491895                | -1.098321 | -0.028569 |
| 7                | 8                | 0              | 0.823038                | -2.217315 | -0.182694 |
| 8                | 1                | 0              | 1.634060                | -2.414107 | 0.293978  |
| 9                | 1                | 0              | 0.967990                | -1.932844 | -1.339053 |

|    |   |   |          |           |           |
|----|---|---|----------|-----------|-----------|
| 10 | 8 | 0 | 0.902029 | -1.131401 | -2.235945 |
| 11 | 1 | 0 | 0.468645 | -0.390133 | -1.431725 |
| 12 | 1 | 0 | 0.256542 | -1.325189 | -2.921131 |

Zero-point Energies= -231.246474 au

C<sub>2</sub>H<sub>3</sub>T:

Input orientation:

| Center<br>Number | Atomic<br>Number | Atomic<br>Type | Coordinates (Angstroms) |           |          |
|------------------|------------------|----------------|-------------------------|-----------|----------|
|                  |                  |                | X                       | Y         | Z        |
| 1                | 6                | 0              | -0.929077               | 0.080310  | 0.000000 |
| 2                | 6                | 0              | 0.396177                | 0.045190  | 0.000000 |
| 3                | 1                | 0              | -1.472755               | 1.018309  | 0.000000 |
| 4                | 1                | 0              | -1.521478               | -0.827843 | 0.000000 |
| 5                | 1                | 0              | 0.988578                | 0.953343  | 0.000000 |
| 6                | 1                | 0              | 0.939855                | -0.892809 | 0.000000 |

Zero-point Energies= -78.516626 au

C<sub>3</sub>H<sub>6</sub>:

Input orientation:

| Center<br>Number | Atomic<br>Number | Atomic<br>Type | Coordinates (Angstroms) |           |           |
|------------------|------------------|----------------|-------------------------|-----------|-----------|
|                  |                  |                | X                       | Y         | Z         |
| 1                | 6                | 0              | -1.459366               | -0.253860 | 0.243484  |
| 2                | 6                | 0              | -0.379175               | 0.466430  | -0.035202 |
| 3                | 6                | 0              | 1.012743                | -0.082088 | -0.128790 |
| 4                | 1                | 0              | -1.392775               | -1.322060 | 0.425688  |
| 5                | 1                | 0              | -0.490300               | 1.534283  | -0.211118 |
| 6                | 1                | 0              | 1.672831                | 0.405960  | 0.593531  |
| 7                | 1                | 0              | 1.026048                | -1.156227 | 0.063027  |
| 8                | 1                | 0              | 1.436415                | 0.096964  | -1.120818 |
| 9                | 1                | 0              | -2.443121               | 0.196499  | 0.299798  |

Zero-point Energies= -117.791794 au

TS<sub>CH<sub>2</sub>T-CH=CH<sub>2</sub></sub>:

Input orientation:

| Center<br>Number | Atomic<br>Number | Atomic<br>Type | Coordinates (Angstroms) |           |           |
|------------------|------------------|----------------|-------------------------|-----------|-----------|
|                  |                  |                | X                       | Y         | Z         |
| 1                | 6                | 0              | -1.607532               | 0.200833  | 0.400911  |
| 2                | 6                | 0              | -0.435280               | 0.384109  | -0.213491 |
| 3                | 6                | 0              | 0.859030                | -0.258274 | 0.135903  |
| 4                | 1                | 0              | -1.686674               | -0.415689 | 1.291632  |
| 5                | 1                | 0              | -0.428006               | 1.019992  | -1.100001 |
| 6                | 1                | 0              | 0.909435                | -0.408992 | 1.221823  |
| 7                | 1                | 0              | 1.712655                | 0.366989  | -0.136409 |
| 8                | 1                | 0              | -2.514119               | 0.671935  | 0.041904  |
| 9                | 1                | 0              | 1.008233                | -1.821821 | 0.230719  |
| 10               | 8                | 0              | 0.992248                | -2.939053 | 0.066934  |
| 11               | 1                | 0              | 1.832340                | -3.336041 | 0.314965  |
| 12               | 1                | 0              | 0.856825                | -2.700925 | -1.110515 |
| 13               | 1                | 0              | -0.145577               | -1.862611 | -2.365712 |
| 14               | 8                | 0              | 0.741350                | -1.897529 | -1.992633 |
| 15               | 1                | 0              | 0.821372                | -1.120624 | -1.192430 |

Zero-point Energies= -270.520481 au

CH<sub>2</sub>T-CH=CH<sub>2</sub>:

Input orientation:

| Center<br>Number | Atomic<br>Number | Atomic<br>Type | Coordinates (Angstroms) |           |           |
|------------------|------------------|----------------|-------------------------|-----------|-----------|
|                  |                  |                | X                       | Y         | Z         |
| 1                | 6                | 0              | -1.459366               | -0.253860 | 0.243484  |
| 2                | 6                | 0              | -0.379175               | 0.466430  | -0.035202 |
| 3                | 6                | 0              | 1.012743                | -0.082088 | -0.128790 |
| 4                | 1                | 0              | -1.392775               | -1.322060 | 0.425688  |
| 5                | 1                | 0              | -0.490300               | 1.534283  | -0.211118 |
| 6                | 1                | 0              | 1.672831                | 0.405960  | 0.593531  |
| 7                | 1                | 0              | 1.026048                | -1.156227 | 0.063027  |
| 8                | 1                | 0              | 1.436415                | 0.096964  | -1.120818 |
| 9                | 1                | 0              | -2.443121               | 0.196499  | 0.299798  |

Zero-point Energies= -117.796246 au

TS<sub>CH<sub>3</sub>-CT=CH<sub>2</sub></sub>:

Input orientation:

| Center<br>Number | Atomic<br>Number | Atomic<br>Type | Coordinates (Angstroms) |           |           |
|------------------|------------------|----------------|-------------------------|-----------|-----------|
|                  |                  |                | X                       | Y         | Z         |
| 1                | 1                | 0              | -0.480503               | 1.335558  | -1.142149 |
| 2                | 6                | 0              | -1.352105               | -0.358974 | 0.134472  |
| 3                | 6                | 0              | -0.233509               | 0.334788  | -0.102653 |
| 4                | 6                | 0              | 1.120093                | -0.326136 | -0.001007 |
| 5                | 1                | 0              | -1.347693               | -1.415468 | 0.407968  |
| 6                | 1                | 0              | 1.746451                | 0.180443  | 0.739398  |
| 7                | 1                | 0              | 1.047078                | -1.381985 | 0.278659  |
| 8                | 1                | 0              | 1.657653                | -0.265272 | -0.952471 |
| 9                | 1                | 0              | -2.333219               | 0.104319  | 0.052351  |
| 10               | 8                | 0              | -0.729498               | 2.317878  | -1.768227 |
| 11               | 1                | 0              | -0.524621               | 2.915171  | -0.748450 |
| 12               | 1                | 0              | -0.953147               | 3.218936  | 1.009989  |
| 13               | 8                | 0              | -0.253471               | 2.914604  | 0.425643  |
| 14               | 1                | 0              | -0.255362               | 1.728679  | 0.325029  |
| 15               | 1                | 0              | -0.093746               | 2.472057  | -2.472153 |

Zero-point Energies= -270.524679 au

CH<sub>3</sub>-CT=CH<sub>2</sub>:

Input orientation:

| Center<br>Number | Atomic<br>Number | Atomic<br>Type | Coordinates (Angstroms) |           |           |
|------------------|------------------|----------------|-------------------------|-----------|-----------|
|                  |                  |                | X                       | Y         | Z         |
| 1                | 6                | 0              | -1.459366               | -0.253860 | 0.243484  |
| 2                | 6                | 0              | -0.379175               | 0.466430  | -0.035202 |
| 3                | 6                | 0              | 1.012743                | -0.082088 | -0.128790 |
| 4                | 1                | 0              | -1.392775               | -1.322060 | 0.425688  |
| 5                | 1                | 0              | -0.490300               | 1.534283  | -0.211118 |
| 6                | 1                | 0              | 1.672831                | 0.405960  | 0.593531  |
| 7                | 1                | 0              | 1.026048                | -1.156227 | 0.063027  |
| 8                | 1                | 0              | 1.436415                | 0.096964  | -1.120818 |
| 9                | 1                | 0              | -2.443121               | 0.196499  | 0.299798  |

Zero-point Energies= -117.796325 au



TS<sub>CH3-CH=CHT</sub>:

Input orientation:

| Center<br>Number | Atomic<br>Number | Atomic<br>Type | Coordinates (Angstroms) |           |           |
|------------------|------------------|----------------|-------------------------|-----------|-----------|
|                  |                  |                | X                       | Y         | Z         |
| 1                | 1                | 0              | -1.425937               | 0.628881  | 0.344687  |
| 2                | 1                | 0              | -0.630686               | 0.362368  | 1.641305  |
| 3                | 8                | 0              | -1.204606               | 0.895930  | 2.563085  |
| 4                | 1                | 0              | -1.477723               | 0.263924  | 3.233040  |
| 5                | 6                | 0              | -0.167450               | -0.050799 | 0.351346  |
| 6                | 6                | 0              | 0.909813                | 0.643497  | -0.042641 |
| 7                | 6                | 0              | 2.070902                | 0.121822  | -0.834374 |
| 8                | 1                | 0              | -0.194847               | -1.105004 | 0.065881  |
| 9                | 1                | 0              | 0.979438                | 1.698739  | 0.233662  |
| 10               | 1                | 0              | 3.004838                | 0.245921  | -0.278000 |
| 11               | 1                | 0              | 1.941684                | -0.934637 | -1.072774 |
| 12               | 1                | 0              | 2.184066                | 0.681514  | -1.767842 |
| 13               | 8                | 0              | -2.466606               | 1.176111  | 0.627834  |
| 14               | 1                | 0              | -2.539997               | 2.041641  | 0.217427  |
| 15               | 1                | 0              | -2.047288               | 1.176491  | 1.756564  |

Zero-point Energies= -270.528399 au

CH<sub>3</sub>-CH=CHT:

Input orientation:

| Center<br>Number | Atomic<br>Number | Atomic<br>Type | Coordinates (Angstroms) |           |           |
|------------------|------------------|----------------|-------------------------|-----------|-----------|
|                  |                  |                | X                       | Y         | Z         |
| 1                | 6                | 0              | -1.459366               | -0.253860 | 0.243484  |
| 2                | 6                | 0              | -0.379175               | 0.466430  | -0.035202 |
| 3                | 6                | 0              | 1.012743                | -0.082088 | -0.128790 |
| 4                | 1                | 0              | -1.392775               | -1.322060 | 0.425688  |
| 5                | 1                | 0              | -0.490300               | 1.534283  | -0.211118 |
| 6                | 1                | 0              | 1.672831                | 0.405960  | 0.593531  |
| 7                | 1                | 0              | 1.026048                | -1.156227 | 0.063027  |
| 8                | 1                | 0              | 1.436415                | 0.096964  | -1.120818 |
| 9                | 1                | 0              | -2.443121               | 0.196499  | 0.299798  |

Zero-point Energies= -117.796271 au

CH<sub>3</sub>CH<sub>2</sub>OH:

Input orientation:

| Center<br>Number | Atomic<br>Number | Atomic<br>Type | Coordinates (Angstroms) |           |           |
|------------------|------------------|----------------|-------------------------|-----------|-----------|
|                  |                  |                | X                       | Y         | Z         |
| 1                | 6                | 0              | -1.326389               | 0.209170  | -0.141392 |
| 2                | 6                | 0              | 0.066947                | -0.130429 | 0.343365  |
| 3                | 8                | 0              | 0.882511                | -0.328724 | -0.802333 |
| 4                | 1                | 0              | -1.301341               | 1.112369  | -0.753204 |
| 5                | 1                | 0              | -1.998221               | 0.376126  | 0.702783  |
| 6                | 1                | 0              | -1.721921               | -0.606525 | -0.748627 |
| 7                | 1                | 0              | 0.461862                | 0.686407  | 0.959872  |
| 8                | 1                | 0              | 0.041830                | -1.037422 | 0.959538  |
| 9                | 1                | 0              | 1.769024                | -0.562073 | -0.519903 |

Zero-point Energies= -154.932147 au

TS<sub>CH2T-CH2-OH</sub>:

Input orientation:

| Center<br>Number | Atomic<br>Number | Atomic<br>Type | Coordinates (Angstroms) |           |           |
|------------------|------------------|----------------|-------------------------|-----------|-----------|
|                  |                  |                | X                       | Y         | Z         |
| 1                | 1                | 0              | -1.796845               | 1.389864  | 0.858495  |
| 2                | 8                | 0              | -2.442268               | 1.862388  | 1.723554  |
| 3                | 1                | 0              | -3.116958               | 0.884272  | 1.628562  |
| 4                | 8                | 0              | -3.342130               | -0.172330 | 1.075276  |
| 5                | 1                | 0              | -2.422353               | 0.113190  | 0.392404  |
| 6                | 6                | 0              | -1.172436               | 0.597086  | -0.236917 |
| 7                | 6                | 0              | -0.079145               | -0.335603 | 0.232954  |
| 8                | 8                | 0              | 0.947983                | -0.400775 | -0.754756 |
| 9                | 1                | 0              | -0.722728               | 1.567625  | -0.484547 |
| 10               | 1                | 0              | -1.565030               | 0.239656  | -1.196797 |
| 11               | 1                | 0              | 0.342546                | 0.023944  | 1.182331  |
| 12               | 1                | 0              | -0.490078               | -1.337340 | 0.413828  |
| 13               | 1                | 0              | 1.622103                | -1.019643 | -0.463788 |
| 14               | 1                | 0              | -4.166275               | -0.215117 | 0.582928  |
| 15               | 1                | 0              | -1.954985               | 1.941382  | 2.548172  |

Zero-point Energies= -307.658180 au

CH<sub>2</sub>T-CH<sub>2</sub>-OH:

Input orientation:

| Center<br>Number | Atomic<br>Number | Atomic<br>Type | Coordinates (Angstroms) |           |           |
|------------------|------------------|----------------|-------------------------|-----------|-----------|
|                  |                  |                | X                       | Y         | Z         |
| 1                | 6                | 0              | -1.326389               | 0.209170  | -0.141392 |
| 2                | 6                | 0              | 0.066947                | -0.130429 | 0.343365  |
| 3                | 8                | 0              | 0.882511                | -0.328724 | -0.802333 |
| 4                | 1                | 0              | -1.301341               | 1.112369  | -0.753204 |
| 5                | 1                | 0              | -1.998221               | 0.376126  | 0.702783  |
| 6                | 1                | 0              | -1.721921               | -0.606525 | -0.748627 |
| 7                | 1                | 0              | 0.461862                | 0.686407  | 0.959872  |
| 8                | 1                | 0              | 0.041830                | -1.037422 | 0.959538  |
| 9                | 1                | 0              | 1.769024                | -0.562073 | -0.519903 |

Zero-point Energies= -154.936641 au

TS<sub>CH<sub>3</sub>-CHT-OH</sub>:

Input orientation:

| Center<br>Number | Atomic<br>Number | Atomic<br>Type | Coordinates (Angstroms) |           |           |
|------------------|------------------|----------------|-------------------------|-----------|-----------|
|                  |                  |                | X                       | Y         | Z         |
| 1                | 6                | 0              | -1.266802               | 0.280899  | -0.568964 |
| 2                | 6                | 0              | -0.226284               | -0.135033 | 0.465262  |
| 3                | 8                | 0              | 0.929435                | -0.585913 | -0.257819 |
| 4                | 1                | 0              | -0.912315               | 1.116437  | -1.178488 |
| 5                | 1                | 0              | -2.191497               | 0.586827  | -0.074936 |
| 6                | 1                | 0              | -1.485862               | -0.554146 | -1.238913 |
| 7                | 1                | 0              | 0.082600                | 1.270167  | 0.707220  |
| 8                | 1                | 0              | -0.661484               | -0.974183 | 1.028423  |
| 9                | 1                | 0              | 1.628843                | -0.768117 | 0.376319  |
| 10               | 8                | 0              | 0.568341                | 2.341085  | 0.919148  |
| 11               | 1                | 0              | 1.015682                | 1.826887  | 1.847559  |
| 12               | 8                | 0              | 1.115311                | 0.767065  | 2.530641  |
| 13               | 1                | 0              | 0.314210                | 0.345427  | 1.691625  |
| 14               | 1                | 0              | 1.227802                | 2.554776  | 0.252239  |
| 15               | 1                | 0              | 0.785421                | 0.778724  | 3.431883  |

-----  
Zero-point Energies= -307.653337 au

CH<sub>3</sub>-CHT-OH:

Input orientation:

| Center<br>Number | Atomic<br>Number | Atomic<br>Type | Coordinates (Angstroms) |           |           |
|------------------|------------------|----------------|-------------------------|-----------|-----------|
|                  |                  |                | X                       | Y         | Z         |
| 1                | 6                | 0              | -1.326389               | 0.209170  | -0.141392 |
| 2                | 6                | 0              | 0.066947                | -0.130429 | 0.343365  |
| 3                | 8                | 0              | 0.882511                | -0.328724 | -0.802333 |
| 4                | 1                | 0              | -1.301341               | 1.112369  | -0.753204 |
| 5                | 1                | 0              | -1.998221               | 0.376126  | 0.702783  |
| 6                | 1                | 0              | -1.721921               | -0.606525 | -0.748627 |
| 7                | 1                | 0              | 0.461862                | 0.686407  | 0.959872  |
| 8                | 1                | 0              | 0.041830                | -1.037422 | 0.959538  |
| 9                | 1                | 0              | 1.769024                | -0.562073 | -0.519903 |

-----  
Zero-point Energies= -154.936920 au

TS<sub>CH<sub>3</sub>-CH<sub>2</sub>-OT</sub>:

Input orientation:

| Center<br>Number | Atomic<br>Number | Atomic<br>Type | Coordinates (Angstroms) |           |           |
|------------------|------------------|----------------|-------------------------|-----------|-----------|
|                  |                  |                | X                       | Y         | Z         |
| 1                | 6                | 0              | -1.441382               | 0.189442  | -0.072279 |
| 2                | 6                | 0              | -0.057219               | -0.222271 | 0.388111  |
| 3                | 8                | 0              | 0.795971                | -0.397528 | -0.742312 |
| 4                | 1                | 0              | -1.402598               | 1.141812  | -0.605890 |
| 5                | 1                | 0              | -2.110810               | 0.302477  | 0.782659  |
| 6                | 1                | 0              | -1.854456               | -0.563694 | -0.744696 |
| 7                | 1                | 0              | 0.373575                | 0.531477  | 1.058712  |
| 8                | 1                | 0              | -0.092178               | -1.171025 | 0.927710  |
| 9                | 1                | 0              | 1.911647                | -0.494504 | -0.444274 |
| 10               | 8                | 0              | 3.097816                | -0.053622 | -0.325277 |
| 11               | 1                | 0              | 2.726735                | 0.871250  | -1.004579 |
| 12               | 8                | 0              | 1.893867                | 1.504179  | -1.626063 |
| 13               | 1                | 0              | 1.066878                | 0.611328  | -1.242578 |
| 14               | 1                | 0              | 1.762613                | 2.406251  | -1.330534 |
| 15               | 1                | 0              | 3.793343                | -0.581371 | -0.721310 |

-----  
Zero-point Energies= -307.730242 au

CH<sub>3</sub>-CH<sub>2</sub>-OT:

Input orientation:

| Center<br>Number | Atomic<br>Number | Atomic<br>Type | Coordinates (Angstroms) |           |           |
|------------------|------------------|----------------|-------------------------|-----------|-----------|
|                  |                  |                | X                       | Y         | Z         |
| 1                | 6                | 0              | -1.326389               | 0.209170  | -0.141392 |
| 2                | 6                | 0              | 0.066947                | -0.130429 | 0.343365  |
| 3                | 8                | 0              | 0.882511                | -0.328724 | -0.802333 |
| 4                | 1                | 0              | -1.301341               | 1.112369  | -0.753204 |
| 5                | 1                | 0              | -1.998221               | 0.376126  | 0.702783  |
| 6                | 1                | 0              | -1.721921               | -0.606525 | -0.748627 |
| 7                | 1                | 0              | 0.461862                | 0.686407  | 0.959872  |
| 8                | 1                | 0              | 0.041830                | -1.037422 | 0.959538  |
| 9                | 1                | 0              | 1.769024                | -0.562073 | -0.519903 |

Zero-point Energies= -154.936937 au

CH<sub>3</sub>CHO:

Input orientation:

| Center<br>Number | Atomic<br>Number | Atomic<br>Type | Coordinates (Angstroms) |           |           |
|------------------|------------------|----------------|-------------------------|-----------|-----------|
|                  |                  |                | X                       | Y         | Z         |
| 1                | 6                | 0              | -1.002749               | -0.103183 | -0.224436 |
| 2                | 6                | 0              | 0.426311                | -0.538454 | -0.067101 |
| 3                | 1                | 0              | 0.989916                | -0.041977 | 0.748732  |
| 4                | 8                | 0              | 0.963547                | -1.363540 | -0.753404 |
| 5                | 1                | 0              | -1.035558               | 0.974857  | -0.404189 |
| 6                | 1                | 0              | -1.542279               | -0.288897 | 0.708340  |
| 7                | 1                | 0              | -1.476687               | -0.636804 | -1.046442 |

Zero-point Energies= -153.748587 au

TS1<sub>CH<sub>2</sub>=CH-OT</sub>:

Input orientation:

| Center<br>Number | Atomic<br>Number | Atomic<br>Type | Coordinates (Angstroms) |           |           |
|------------------|------------------|----------------|-------------------------|-----------|-----------|
|                  |                  |                | X                       | Y         | Z         |
| 1                | 6                | 0              | -0.999521               | -0.292345 | -0.005939 |
| 2                | 6                | 0              | 0.405162                | -0.274340 | -0.002361 |
| 3                | 8                | 0              | 1.097444                | 0.326744  | -0.874980 |
| 4                | 1                | 0              | -0.419200               | 2.775993  | -0.816712 |
| 5                | 1                | 0              | -1.494730               | -0.750874 | 0.839407  |
| 6                | 1                | 0              | -1.480815               | -0.463217 | -0.968116 |
| 7                | 1                | 0              | -1.046616               | 1.123498  | -0.401599 |
| 8                | 1                | 0              | 0.282111                | 1.273723  | -1.275999 |
| 9                | 8                | 0              | -0.639329               | 1.921810  | -1.201448 |
| 10               | 1                | 0              | 0.953753                | -0.690789 | 0.851956  |

Zero-point Energies= -230.099795 au

CH<sub>2</sub>=CH-OT:

Input orientation:

| Center<br>Number | Atomic<br>Number | Atomic<br>Type | Coordinates (Angstroms) |           |           |
|------------------|------------------|----------------|-------------------------|-----------|-----------|
|                  |                  |                | X                       | Y         | Z         |
| 1                | 6                | 0              | -0.965491               | -0.451613 | -0.004980 |
| 2                | 6                | 0              | 0.339064                | -0.224034 | 0.093897  |
| 3                | 8                | 0              | 1.104873                | 0.481156  | -0.775563 |
| 4                | 1                | 0              | -1.469283               | -1.029393 | 0.755760  |
| 5                | 1                | 0              | -1.554388               | -0.072562 | -0.832975 |
| 6                | 1                | 0              | 0.557282                | 0.805822  | -1.496813 |
| 7                | 1                | 0              | 0.937728                | -0.596948 | 0.916314  |

Zero-point Energies= -153.738211 au

TS2<sub>CH<sub>2</sub>T-CHO</sub>:

Input orientation:

| Center<br>Number | Atomic<br>Number | Atomic<br>Type | Coordinates (Angstroms) |          |           |
|------------------|------------------|----------------|-------------------------|----------|-----------|
|                  |                  |                | X                       | Y        | Z         |
| 1                | 8                | 0              | -0.968578               | 2.133437 | 0.075220  |
| 2                | 1                | 0              | -1.450673               | 2.458009 | -0.690787 |

|    |   |   |           |           |           |
|----|---|---|-----------|-----------|-----------|
| 3  | 1 | 0 | 0.036572  | 1.728889  | -0.208307 |
| 4  | 6 | 0 | -0.986730 | -0.437295 | 0.081487  |
| 5  | 6 | 0 | 0.374246  | -0.182819 | 0.319530  |
| 6  | 8 | 0 | 0.993756  | 0.811090  | -0.159446 |
| 7  | 1 | 0 | -1.441165 | -1.264262 | 0.610745  |
| 8  | 1 | 0 | -1.333580 | -0.302455 | -0.941704 |
| 9  | 1 | 0 | -1.281794 | 1.006483  | 0.296313  |
| 10 | 1 | 0 | 0.919986  | -0.792708 | 1.051280  |

-----  
 Zero-point Energies= -230.101759 au

CH<sub>2</sub>T-CHO:

Input orientation:

| Center<br>Number | Atomic<br>Number | Atomic<br>Type | Coordinates (Angstroms) |           |           |
|------------------|------------------|----------------|-------------------------|-----------|-----------|
|                  |                  |                | X                       | Y         | Z         |
| 1                | 6                | 0              | -1.002749               | -0.103183 | -0.224436 |
| 2                | 6                | 0              | 0.426311                | -0.538454 | -0.067101 |
| 3                | 1                | 0              | 0.989916                | -0.041977 | 0.748732  |
| 4                | 8                | 0              | 0.963547                | -1.363540 | -0.753404 |
| 5                | 1                | 0              | -1.035558               | 0.974857  | -0.404189 |
| 6                | 1                | 0              | -1.542279               | -0.288897 | 0.708340  |
| 7                | 1                | 0              | -1.476687               | -0.636804 | -1.046442 |

-----  
 Zero-point Energies= -153.753083 au

TS<sub>CH<sub>3</sub>-CTO</sub>:

Input orientation:

| Center<br>Number | Atomic<br>Number | Atomic<br>Type | Coordinates (Angstroms) |           |           |
|------------------|------------------|----------------|-------------------------|-----------|-----------|
|                  |                  |                | X                       | Y         | Z         |
| 1                | 8                | 0              | 1.016256                | 1.367935  | 1.939752  |
| 2                | 1                | 0              | 1.496368                | 0.216669  | 2.236651  |
| 3                | 8                | 0              | 1.517228                | -0.911238 | 2.071957  |
| 4                | 1                | 0              | 0.702459                | -0.817379 | 1.392971  |
| 5                | 6                | 0              | -1.375941               | -0.073653 | -0.672049 |
| 6                | 6                | 0              | -0.016923               | -0.231523 | -0.014056 |
| 7                | 8                | 0              | 0.905604                | -0.680320 | -0.688703 |
| 8                | 1                | 0              | -1.355233               | -0.411247 | -1.711303 |
| 9                | 1                | 0              | -1.682619               | 0.976545  | -0.626814 |
| 10               | 1                | 0              | -2.119363               | -0.641916 | -0.104390 |
| 11               | 1                | 0              | 0.391366                | 0.862686  | 1.207998  |
| 12               | 1                | 0              | 0.476069                | 1.823810  | 2.591875  |
| 13               | 1                | 0              | 2.257730                | -1.163768 | 1.502911  |

-----  
 Zero-point Energies= -306.473485 au

CH<sub>3</sub>-CTO:

Input orientation:

| Center<br>Number | Atomic<br>Number | Atomic<br>Type | Coordinates (Angstroms) |           |           |
|------------------|------------------|----------------|-------------------------|-----------|-----------|
|                  |                  |                | X                       | Y         | Z         |
| 1                | 6                | 0              | -1.002749               | -0.103183 | -0.224436 |
| 2                | 6                | 0              | 0.426311                | -0.538454 | -0.067101 |
| 3                | 1                | 0              | 0.989916                | -0.041977 | 0.748732  |
| 4                | 8                | 0              | 0.963547                | -1.363540 | -0.753404 |
| 5                | 1                | 0              | -1.035558               | 0.974857  | -0.404189 |
| 6                | 1                | 0              | -1.542279               | -0.288897 | 0.708340  |
| 7                | 1                | 0              | -1.476687               | -0.636804 | -1.046442 |

-----  
Zero-point Energies= -153.752981 au

CH<sub>3</sub>COCH<sub>3</sub>:

Input orientation:

| Center<br>Number | Atomic<br>Number | Atomic<br>Type | Coordinates (Angstroms) |           |           |
|------------------|------------------|----------------|-------------------------|-----------|-----------|
|                  |                  |                | X                       | Y         | Z         |
| 1                | 6                | 0              | -1.016233               | -0.122224 | -0.232109 |
| 2                | 6                | 0              | 0.415808                | -0.593234 | -0.101943 |
| 3                | 6                | 0              | 1.258100                | 0.103770  | 0.944091  |
| 4                | 8                | 0              | 0.860562                | -1.474093 | -0.793480 |
| 5                | 1                | 0              | 2.266781                | -0.303804 | 0.940544  |
| 6                | 1                | 0              | -1.035793               | 0.941070  | -0.485333 |
| 7                | 1                | 0              | -1.534753               | -0.235977 | 0.723352  |
| 8                | 1                | 0              | -1.526949               | -0.695582 | -1.002879 |
| 9                | 1                | 0              | 0.807405                | -0.026969 | 1.931457  |
| 10               | 1                | 0              | 1.288674                | 1.177746  | 0.743400  |

-----  
Zero-point Energies= -193.035356 au

TS1<sub>CH<sub>2</sub>=COT-CH<sub>3</sub></sub>:

Input orientation:

| Center<br>Number | Atomic<br>Number | Atomic<br>Type | Coordinates (Angstroms) |           |           |
|------------------|------------------|----------------|-------------------------|-----------|-----------|
|                  |                  |                | X                       | Y         | Z         |
| 1                | 1                | 0              | -0.295026               | -0.375996 | -1.447156 |
| 2                | 6                | 0              | -0.594086               | 0.296826  | -0.638126 |
| 3                | 6                | 0              | 0.040828                | -0.197803 | 0.629391  |
| 4                | 8                | 0              | -0.591102               | -1.093816 | 1.277253  |
| 5                | 1                | 0              | -0.251161               | 1.299526  | -0.890290 |
| 6                | 1                | 0              | -1.680199               | 0.266130  | -0.556495 |
| 7                | 6                | 0              | 1.228885                | 0.369026  | 1.143910  |
| 8                | 1                | 0              | 1.666874                | 1.196449  | 0.601126  |
| 9                | 1                | 0              | 1.951056                | -0.342575 | 1.542385  |
| 10               | 1                | 0              | -0.495688               | 0.189999  | 3.854887  |
| 11               | 1                | 0              | 0.710440                | 0.396263  | 2.501973  |
| 12               | 1                | 0              | -0.268753               | -0.876216 | 2.478904  |
| 13               | 8                | 0              | 0.187579                | -0.274191 | 3.362114  |

-----  
Zero-point Energies= -269.386986 au

CH<sub>2</sub>=COT-CH<sub>3</sub>:

Input orientation:

| Center<br>Number | Atomic<br>Number | Atomic<br>Type | Coordinates (Angstroms) |           |           |
|------------------|------------------|----------------|-------------------------|-----------|-----------|
|                  |                  |                | X                       | Y         | Z         |
| 1                | 1                | 0              | 0.326284                | 0.631828  | -1.228254 |
| 2                | 6                | 0              | -0.486441               | 0.278118  | -0.596841 |
| 3                | 6                | 0              | -0.012993               | 0.041408  | 0.800350  |
| 4                | 8                | 0              | -1.036089               | -0.405696 | 1.584819  |
| 5                | 1                | 0              | -1.291164               | 1.016789  | -0.594159 |
| 6                | 1                | 0              | -0.890302               | -0.648342 | -1.011372 |
| 7                | 6                | 0              | 1.229904                | 0.233681  | 1.239300  |
| 8                | 1                | 0              | 1.995969                | 0.590023  | 0.566721  |
| 9                | 1                | 0              | -0.714685               | -0.554315 | 2.479147  |
| 10               | 1                | 0              | 1.506816                | 0.041205  | 2.269689  |

Zero-point Energies= -193.022146 au

TS<sub>2</sub>CH<sub>3</sub>COCH<sub>2</sub>T:

Input orientation:

| Center<br>Number | Atomic<br>Number | Atomic<br>Type | Coordinates (Angstroms) |           |           |
|------------------|------------------|----------------|-------------------------|-----------|-----------|
|                  |                  |                | X                       | Y         | Z         |
| 1                | 8                | 0              | -0.906784               | 2.198099  | -0.104965 |
| 2                | 1                | 0              | -1.387077               | 2.447502  | -0.899280 |
| 3                | 1                | 0              | 0.081387                | 1.656794  | -0.343445 |
| 4                | 6                | 0              | -1.081734               | -0.330943 | 0.262279  |
| 5                | 6                | 0              | 0.309518                | -0.162140 | 0.446260  |
| 6                | 8                | 0              | 0.951921                | 0.734369  | -0.189803 |
| 7                | 1                | 0              | -1.588733               | -1.046169 | 0.896816  |
| 8                | 1                | 0              | -1.418973               | -0.328085 | -0.772927 |
| 9                | 6                | 0              | 1.074558                | -0.945005 | 1.474249  |
| 10               | 1                | 0              | 1.826386                | -0.313666 | 1.946693  |
| 11               | 1                | 0              | 0.410644                | -1.382983 | 2.218514  |
| 12               | 1                | 0              | 1.591274                | -1.759100 | 0.957255  |
| 13               | 1                | 0              | -1.288389               | 1.125227  | 0.272155  |

Zero-point Energies= -269.388932 au

CH<sub>3</sub>COCH<sub>2</sub>T:

Input orientation:

| Center<br>Number | Atomic<br>Number | Atomic<br>Type | Coordinates (Angstroms) |           |           |
|------------------|------------------|----------------|-------------------------|-----------|-----------|
|                  |                  |                | X                       | Y         | Z         |
| 1                | 6                | 0              | -1.016233               | -0.122224 | -0.232109 |
| 2                | 6                | 0              | 0.415808                | -0.593234 | -0.101943 |
| 3                | 6                | 0              | 1.258100                | 0.103770  | 0.944091  |
| 4                | 8                | 0              | 0.860562                | -1.474093 | -0.793480 |
| 5                | 1                | 0              | 2.266781                | -0.303804 | 0.940544  |
| 6                | 1                | 0              | -1.035793               | 0.941070  | -0.485333 |
| 7                | 1                | 0              | -1.534753               | -0.235977 | 0.723352  |
| 8                | 1                | 0              | -1.526949               | -0.695582 | -1.002879 |
| 9                | 1                | 0              | 0.807405                | -0.026969 | 1.931457  |
| 10               | 1                | 0              | 1.288674                | 1.177746  | 0.743400  |

Zero-point Energies= -193.039780 au

CH<sub>3</sub>COOH:

Input orientation:

| Center<br>Number | Atomic<br>Number | Atomic<br>Type | Coordinates (Angstroms) |           |           |
|------------------|------------------|----------------|-------------------------|-----------|-----------|
|                  |                  |                | X                       | Y         | Z         |
| 1                | 6                | 0              | -0.951219               | -0.101509 | -0.182994 |
| 2                | 6                | 0              | 0.464803                | -0.587143 | -0.077509 |
| 3                | 8                | 0              | 1.147956                | 0.083426  | 0.873941  |
| 4                | 8                | 0              | 0.965225                | -1.456345 | -0.734211 |
| 5                | 1                | 0              | 2.045036                | -0.275709 | 0.890422  |
| 6                | 1                | 0              | -0.953049               | 0.962308  | -0.424531 |
| 7                | 1                | 0              | -1.449528               | -0.223398 | 0.779667  |
| 8                | 1                | 0              | -1.470424               | -0.665030 | -0.952985 |

Zero-point Energies= -229.002259 au

TS<sub>CH<sub>2</sub>T-COOH</sub>:

Input orientation:

| Center<br>Number | Atomic<br>Number | Atomic<br>Type | Coordinates (Angstroms) |           |           |
|------------------|------------------|----------------|-------------------------|-----------|-----------|
|                  |                  |                | X                       | Y         | Z         |
| 1                | 1                | 0              | -1.049300               | 0.743468  | -1.474895 |
| 2                | 6                | 0              | -1.038368               | -0.345117 | -0.104396 |
| 3                | 6                | 0              | 0.386022                | -0.598644 | -0.086103 |
| 4                | 8                | 0              | 1.046007                | 0.242793  | 0.818687  |
| 5                | 8                | 0              | 1.054324                | -1.323580 | -0.783425 |
| 6                | 1                | 0              | 1.976574                | -0.009490 | 0.771337  |
| 7                | 1                | 0              | -1.443506               | -0.247353 | 0.906466  |
| 8                | 1                | 0              | -1.572506               | -1.121806 | -0.645851 |
| 9                | 1                | 0              | -1.002595               | 1.397311  | 0.287559  |
| 10               | 8                | 0              | -0.662908               | 2.371824  | 0.181310  |
| 11               | 1                | 0              | -0.700767               | 2.287178  | -0.958399 |
| 12               | 8                | 0              | -0.854206               | 1.616413  | -2.034731 |
| 13               | 1                | 0              | -1.588175               | 1.811705  | -2.624748 |
| 14               | 1                | 0              | 0.251003                | 2.300498  | 0.501791  |

Zero-point Energies= -381.742206 au

TS1<sub>CH<sub>2</sub>=C(OT)(OH)</sub>:

Input orientation:

| Center<br>Number | Atomic<br>Number | Atomic<br>Type | Coordinates (Angstroms) |           |           |
|------------------|------------------|----------------|-------------------------|-----------|-----------|
|                  |                  |                | X                       | Y         | Z         |
| 1                | 6                | 0              | -1.004716               | -0.282852 | 0.014473  |
| 2                | 6                | 0              | 0.401407                | -0.283138 | 0.005668  |
| 3                | 8                | 0              | 1.065556                | -0.825691 | 1.026048  |
| 4                | 8                | 0              | 1.096556                | 0.332594  | -0.867423 |
| 5                | 1                | 0              | 1.995595                | -0.582153 | 0.928140  |
| 6                | 1                | 0              | -0.455326               | 2.788892  | -0.808392 |
| 7                | 1                | 0              | -1.479530               | -0.739832 | 0.871637  |
| 8                | 1                | 0              | -1.451979               | -0.521717 | -0.947314 |
| 9                | 1                | 0              | -1.050594               | 1.154982  | -0.441145 |
| 10               | 1                | 0              | 0.339638                | 1.251635  | -1.229332 |
| 11               | 8                | 0              | -0.623771               | 1.929118  | -1.205030 |

Zero-point Energies= -305.347903 au

CH<sub>2</sub>=C(OT)(OH):

Input orientation:

| Center<br>Number | Atomic<br>Number | Atomic<br>Type | Coordinates (Angstroms) |           |           |
|------------------|------------------|----------------|-------------------------|-----------|-----------|
|                  |                  |                | X                       | Y         | Z         |
| 1                | 6                | 0              | -0.978038               | -0.458847 | 0.011319  |
| 2                | 6                | 0              | 0.334780                | -0.263714 | 0.096867  |
| 3                | 8                | 0              | 1.094255                | -0.769375 | 1.083811  |
| 4                | 8                | 0              | 1.101842                | 0.452097  | -0.766671 |
| 5                | 1                | 0              | 2.003828                | -0.488404 | 0.941323  |
| 6                | 1                | 0              | -1.477439               | -1.047310 | 0.763980  |
| 7                | 1                | 0              | -1.547873               | -0.034074 | -0.801387 |
| 8                | 1                | 0              | 0.552826                | 0.810762  | -1.469178 |

Zero-point Energies= -228.966046 au

TS2<sub>CH<sub>2</sub>T-COOH</sub>:

Input orientation:



| Center Number | Atomic Number | Atomic Type | Coordinates (Angstroms) |           |           |
|---------------|---------------|-------------|-------------------------|-----------|-----------|
|               |               |             | X                       | Y         | Z         |
| 1             | 8             | 0           | -0.977686               | 2.137587  | 0.075798  |
| 2             | 1             | 0           | -1.441716               | 2.483026  | -0.691608 |
| 3             | 1             | 0           | 0.080977                | 1.688996  | -0.177185 |
| 4             | 6             | 0           | -0.996170               | -0.438959 | 0.104017  |
| 5             | 6             | 0           | 0.370198                | -0.189387 | 0.329115  |
| 6             | 8             | 0           | 1.047399                | -0.963132 | 1.174917  |
| 7             | 8             | 0           | 0.981364                | 0.829748  | -0.132170 |
| 8             | 1             | 0           | 1.896415                | -0.532985 | 1.344224  |
| 9             | 1             | 0           | -1.425721               | -1.272127 | 0.643290  |
| 10            | 1             | 0           | -1.290505               | -0.362980 | -0.939581 |
| 11            | 1             | 0           | -1.304154               | 1.037713  | 0.274982  |

Zero-point Energies= -305.350374 au

CH<sub>2</sub>T-COOH:

Input orientation:

| Center Number | Atomic Number | Atomic Type | Coordinates (Angstroms) |           |           |
|---------------|---------------|-------------|-------------------------|-----------|-----------|
|               |               |             | X                       | Y         | Z         |
| 1             | 6             | 0           | -0.951219               | -0.101509 | -0.182994 |
| 2             | 6             | 0           | 0.464803                | -0.587143 | -0.077509 |
| 3             | 8             | 0           | 1.147956                | 0.083426  | 0.873941  |
| 4             | 8             | 0           | 0.965225                | -1.456345 | -0.734211 |
| 5             | 1             | 0           | 2.045036                | -0.275709 | 0.890422  |
| 6             | 1             | 0           | -0.953049               | 0.962308  | -0.424531 |
| 7             | 1             | 0           | -1.449528               | -0.223398 | 0.779667  |
| 8             | 1             | 0           | -1.470424               | -0.665030 | -0.952985 |

Zero-point Energies= -229.006853 au

TS<sub>CH<sub>3</sub>-COOT</sub>:

Input orientation:

| Center Number | Atomic Number | Atomic Type | Coordinates (Angstroms) |           |           |
|---------------|---------------|-------------|-------------------------|-----------|-----------|
|               |               |             | X                       | Y         | Z         |
| 1             | 6             | 0           | -1.659070               | -0.543243 | -0.910379 |
| 2             | 6             | 0           | -0.509973               | -0.292678 | 0.017784  |
| 3             | 8             | 0           | -0.279405               | -1.128171 | 0.942553  |
| 4             | 8             | 0           | 0.182392                | 0.757956  | -0.134946 |
| 5             | 1             | 0           | 0.704138                | -0.627374 | 1.563362  |
| 6             | 1             | 0           | -1.482931               | -0.058149 | -1.867890 |
| 7             | 1             | 0           | -2.554642               | -0.109249 | -0.459520 |
| 8             | 1             | 0           | -1.818824               | -1.612990 | -1.028587 |
| 9             | 1             | 0           | 2.396011                | -0.071291 | 1.651318  |
| 10            | 8             | 0           | 1.484482                | 0.212690  | 1.756962  |
| 11            | 1             | 0           | 1.029265                | 0.700518  | 0.804313  |

Zero-point Energies= -305.403435 au

CH<sub>3</sub>-COOT:

Input orientation:

| Center Number | Atomic Number | Atomic Type | Coordinates (Angstroms) |           |           |
|---------------|---------------|-------------|-------------------------|-----------|-----------|
|               |               |             | X                       | Y         | Z         |
| 1             | 6             | 0           | -0.951219               | -0.101509 | -0.182994 |
| 2             | 6             | 0           | 0.464803                | -0.587143 | -0.077509 |

|   |   |   |           |           |           |
|---|---|---|-----------|-----------|-----------|
| 3 | 8 | 0 | 1.147956  | 0.083426  | 0.873941  |
| 4 | 8 | 0 | 0.965225  | -1.456345 | -0.734211 |
| 5 | 1 | 0 | 2.045036  | -0.275709 | 0.890422  |
| 6 | 1 | 0 | -0.953049 | 0.962308  | -0.424531 |
| 7 | 1 | 0 | -1.449528 | -0.223398 | 0.779667  |
| 8 | 1 | 0 | -1.470424 | -0.665030 | -0.952985 |

-----  
 Zero-point Energies= -229.007290 au

TS<sub>CH<sub>2</sub>OH-CH<sub>2</sub>T</sub>:

Input orientation:

| Center<br>Number | Atomic<br>Number | Atomic<br>Type | Coordinates (Angstroms) |           |           |
|------------------|------------------|----------------|-------------------------|-----------|-----------|
|                  |                  |                | X                       | Y         | Z         |
| 1                | 6                | 0              | -0.728513               | 0.245404  | 0.211621  |
| 2                | 6                | 0              | 0.595523                | -0.209989 | -0.031761 |
| 3                | 1                | 0              | -0.990633               | 1.283526  | 0.028024  |
| 4                | 1                | 0              | -1.566510               | -0.439488 | 0.153003  |
| 5                | 1                | 0              | 1.310953                | 0.496994  | -0.434714 |
| 6                | 1                | 0              | 0.735555                | -1.245460 | -0.315384 |
| 7                | 8                | 0              | -0.577647               | 0.252913  | 1.991714  |
| 8                | 1                | 0              | -0.588588               | 1.120510  | 2.421375  |
| 9                | 1                | 0              | 0.442361                | -0.058112 | 1.426822  |

-----  
 Zero-point Energies= -154.828930 au

CH<sub>2</sub>OH-CH<sub>2</sub>T:

Input orientation:

| Center<br>Number | Atomic<br>Number | Atomic<br>Type | Coordinates (Angstroms) |           |           |
|------------------|------------------|----------------|-------------------------|-----------|-----------|
|                  |                  |                | X                       | Y         | Z         |
| 1                | 6                | 0              | -0.555908               | 0.427455  | 0.457857  |
| 2                | 6                | 0              | 0.746975                | -0.170809 | -0.028672 |
| 3                | 1                | 0              | -0.590163               | 1.498174  | 0.222583  |
| 4                | 1                | 0              | -1.403500               | -0.056281 | -0.042815 |
| 5                | 1                | 0              | 0.850611                | -0.041536 | -1.107842 |
| 6                | 1                | 0              | 0.779781                | -1.236928 | 0.201482  |
| 7                | 8                | 0              | -0.623889               | 0.223297  | 1.861729  |
| 8                | 1                | 0              | -1.436606               | 0.607561  | 2.196265  |
| 9                | 1                | 0              | 1.590126                | 0.314122  | 0.465787  |

-----  
 Zero-point Energies= -154.936644 au

TS<sub>CH<sub>2</sub>=CHT</sub>:

Input orientation:

| Center<br>Number | Atomic<br>Number | Atomic<br>Type | Coordinates (Angstroms) |           |           |
|------------------|------------------|----------------|-------------------------|-----------|-----------|
|                  |                  |                | X                       | Y         | Z         |
| 1                | 6                | 0              | -0.728501               | 0.245392  | 0.211641  |
| 2                | 6                | 0              | 0.595540                | -0.209985 | -0.031744 |
| 3                | 1                | 0              | -0.990634               | 1.283510  | 0.028048  |
| 4                | 1                | 0              | -1.566489               | -0.439511 | 0.153023  |
| 5                | 1                | 0              | 1.310962                | 0.497010  | -0.434691 |
| 6                | 1                | 0              | 0.735585                | -1.245452 | -0.315374 |
| 7                | 8                | 0              | -0.577634               | 0.252899  | 1.991734  |
| 8                | 1                | 0              | -0.588580               | 1.120494  | 2.421397  |
| 9                | 1                | 0              | 0.442374                | -0.058119 | 1.426841  |

Zero-point Energies= -154.830705 au

TS<sub>CH<sub>3</sub>-CHOH-CH<sub>2</sub>T</sub>:

Input orientation:

| Center<br>Number | Atomic<br>Number | Atomic<br>Type | Coordinates (Angstroms) |           |           |
|------------------|------------------|----------------|-------------------------|-----------|-----------|
|                  |                  |                | X                       | Y         | Z         |
| 1                | 6                | 0              | -0.713134               | 0.263922  | 0.137296  |
| 2                | 6                | 0              | 0.613670                | -0.216694 | -0.026910 |
| 3                | 6                | 0              | -1.073131               | 1.678094  | -0.208301 |
| 4                | 1                | 0              | -1.532799               | -0.447020 | 0.116807  |
| 5                | 1                | 0              | 1.344441                | 0.468266  | -0.444757 |
| 6                | 1                | 0              | 0.756604                | -1.267014 | -0.248006 |
| 7                | 1                | 0              | -1.241806               | 1.730367  | -1.287942 |
| 8                | 1                | 0              | -1.979058               | 2.010770  | 0.297724  |
| 9                | 1                | 0              | -0.249051               | 2.352613  | 0.032611  |
| 10               | 8                | 0              | -0.593265               | 0.266511  | 1.985638  |
| 11               | 1                | 0              | -0.645434               | 1.110650  | 2.455187  |
| 12               | 1                | 0              | 0.441262                | -0.025463 | 1.374751  |

Zero-point Energies= -194.111183 au

CH<sub>3</sub>-CHOH-CH<sub>2</sub>T:

Input orientation:

| Center<br>Number | Atomic<br>Number | Atomic<br>Type | Coordinates (Angstroms) |           |           |
|------------------|------------------|----------------|-------------------------|-----------|-----------|
|                  |                  |                | X                       | Y         | Z         |
| 1                | 6                | 0              | -0.759378               | 0.307487  | 0.303008  |
| 2                | 6                | 0              | 0.667169                | -0.138760 | 0.012432  |
| 3                | 6                | 0              | -1.017951               | 1.736252  | -0.156591 |
| 4                | 1                | 0              | -1.456965               | -0.365262 | -0.202690 |
| 5                | 1                | 0              | 0.878059                | -0.106964 | -1.058908 |
| 6                | 1                | 0              | 0.826794                | -1.156000 | 0.372634  |
| 7                | 1                | 0              | -0.860017               | 1.837626  | -1.232748 |
| 8                | 1                | 0              | -2.041691               | 2.031194  | 0.078286  |
| 9                | 1                | 0              | -0.334670               | 2.426894  | 0.349458  |
| 10               | 8                | 0              | -1.065762               | 0.157212  | 1.684280  |
| 11               | 1                | 0              | -0.479134               | 0.731782  | 2.185159  |
| 12               | 1                | 0              | 1.381314                | 0.522221  | 0.515179  |

Zero-point Energies= -194.217939 au

TS<sub>CH<sub>3</sub>-CH=CHT</sub>:

Input orientation:

| Center<br>Number | Atomic<br>Number | Atomic<br>Type | Coordinates (Angstroms) |           |           |
|------------------|------------------|----------------|-------------------------|-----------|-----------|
|                  |                  |                | X                       | Y         | Z         |
| 1                | 6                | 0              | -0.641443               | 0.292899  | 0.326740  |
| 2                | 6                | 0              | 0.639735                | -0.258831 | 0.057670  |
| 3                | 6                | 0              | -1.149723               | 1.479376  | -0.436341 |
| 4                | 1                | 0              | -1.402831               | -0.344288 | 0.764999  |
| 5                | 1                | 0              | 0.775736                | 0.456878  | 1.282684  |
| 6                | 1                | 0              | 1.218490                | 0.190633  | -0.742726 |
| 7                | 1                | 0              | -1.556215               | 1.120867  | -1.386755 |
| 8                | 1                | 0              | -1.938788               | 2.009392  | 0.096695  |
| 9                | 1                | 0              | -0.333213               | 2.168040  | -0.663031 |
| 10               | 8                | 0              | -0.110016               | 0.994549  | 1.956632  |
| 11               | 1                | 0              | -0.103714               | 1.954572  | 2.075744  |

12 1 0 0.788327 -1.318568 0.223153

Zero-point Energies= -194.113057 au

TS<sub>CH<sub>2</sub>=CH-CH<sub>2</sub>T</sub>:

Input orientation:

| Center<br>Number | Atomic<br>Number | Atomic<br>Type | Coordinates (Angstroms) |           |           |
|------------------|------------------|----------------|-------------------------|-----------|-----------|
|                  |                  |                | X                       | Y         | Z         |
| 1                | 6                | 0              | -0.862175               | 0.386087  | 0.246704  |
| 2                | 6                | 0              | 0.527796                | -0.166323 | 0.140731  |
| 3                | 6                | 0              | -1.246705               | 1.550028  | -0.471763 |
| 4                | 1                | 0              | -1.628624               | -0.325324 | 0.537167  |
| 5                | 1                | 0              | 1.255196                | 0.642049  | 0.043100  |
| 6                | 1                | 0              | 0.581213                | -0.774201 | -0.767350 |
| 7                | 1                | 0              | -0.506118               | 2.001117  | -1.124317 |
| 8                | 1                | 0              | -2.280535               | 1.646446  | -0.778875 |
| 9                | 1                | 0              | -1.091215               | 1.965068  | 0.882741  |
| 10               | 8                | 0              | -0.879845               | 1.263214  | 1.878267  |
| 11               | 1                | 0              | -0.050265               | 1.364325  | 2.365352  |
| 12               | 1                | 0              | 0.790544                | -0.795016 | 0.991206  |

Zero-point Energies= -194.113168 au

TS<sub>CH<sub>3</sub>-CHT-CH<sub>2</sub>OH</sub>:

Input orientation:

| Center<br>Number | Atomic<br>Number | Atomic<br>Type | Coordinates (Angstroms) |           |           |
|------------------|------------------|----------------|-------------------------|-----------|-----------|
|                  |                  |                | X                       | Y         | Z         |
| 1                | 6                | 0              | -0.602570               | 0.304393  | -0.015298 |
| 2                | 6                | 0              | 0.571804                | -0.250354 | -0.580720 |
| 3                | 1                | 0              | -0.748057               | 1.379779  | 0.005220  |
| 4                | 1                | 0              | -1.516548               | -0.278147 | 0.040931  |
| 5                | 1                | 0              | 1.267357                | 0.457721  | -1.022705 |
| 6                | 6                | 0              | 0.551623                | -1.646931 | -1.169176 |
| 7                | 1                | 0              | 0.217221                | -1.659213 | -2.211694 |
| 8                | 1                | 0              | -0.116561               | -2.296143 | -0.596984 |
| 9                | 1                | 0              | 1.544159                | -2.100473 | -1.139438 |
| 10               | 8                | 0              | -0.086818               | 0.027690  | 1.717132  |
| 11               | 1                | 0              | 0.061786                | 0.801269  | 2.279920  |
| 12               | 1                | 0              | 0.748238                | -0.249622 | 0.850684  |

Zero-point Energies= -194.101807 au

CH<sub>3</sub>-CHT-CH<sub>2</sub>OH:

Input orientation:

| Center<br>Number | Atomic<br>Number | Atomic<br>Type | Coordinates (Angstroms) |           |           |
|------------------|------------------|----------------|-------------------------|-----------|-----------|
|                  |                  |                | X                       | Y         | Z         |
| 1                | 6                | 0              | -0.592717               | -0.006511 | 0.326205  |
| 2                | 6                | 0              | 0.725018                | -0.558994 | -0.197256 |
| 3                | 1                | 0              | -1.112092               | 0.539792  | -0.472824 |
| 4                | 1                | 0              | -1.243923               | -0.826370 | 0.638284  |
| 5                | 1                | 0              | 1.373459                | 0.276451  | -0.486764 |
| 6                | 6                | 0              | 0.517353                | -1.488221 | -1.390367 |
| 7                | 1                | 0              | 0.018181                | -0.968176 | -2.212132 |
| 8                | 1                | 0              | -0.101472               | -2.345529 | -1.113523 |
| 9                | 1                | 0              | 1.467575                | -1.870754 | -1.765833 |
| 10               | 8                | 0              | -0.431024               | 0.811903  | 1.471401  |

|    |   |   |          |           |          |
|----|---|---|----------|-----------|----------|
| 11 | 1 | 0 | 0.150458 | 1.541479  | 1.243918 |
| 12 | 1 | 0 | 1.229534 | -1.085703 | 0.617503 |

-----  
 Zero-point Energies= -194.211069 au

TS<sub>CH3-CT=CH2</sub>:

Input orientation:

| Center<br>Number | Atomic<br>Number | Atomic<br>Type | Coordinates (Angstroms) |           |           |
|------------------|------------------|----------------|-------------------------|-----------|-----------|
|                  |                  |                | X                       | Y         | Z         |
| 1                | 6                | 0              | -0.633362               | 0.668975  | 0.451698  |
| 2                | 6                | 0              | 0.779199                | 0.650944  | 0.555946  |
| 3                | 1                | 0              | -1.232573               | 1.188442  | 1.192782  |
| 4                | 1                | 0              | -1.118378               | 0.532450  | -0.509518 |
| 5                | 6                | 0              | 1.636317                | 0.500553  | -0.684845 |
| 6                | 1                | 0              | 0.300766                | -0.611796 | 1.061078  |
| 7                | 1                | 0              | 1.825479                | 1.457149  | -1.182755 |
| 8                | 1                | 0              | 1.155089                | -0.162360 | -1.408866 |
| 9                | 1                | 0              | 2.606137                | 0.061995  | -0.442303 |
| 10               | 8                | 0              | -0.851939               | -1.053188 | 1.026113  |
| 11               | 1                | 0              | -1.323719               | -1.206527 | 1.857453  |
| 12               | 1                | 0              | 1.202846                | 1.222840  | 1.376814  |

-----  
 Zero-point Energies= -194.103786 au

TS<sub>CH3-CHT(OOH)</sub>:

Input orientation:

| Center<br>Number | Atomic<br>Number | Atomic<br>Type | Coordinates (Angstroms) |           |           |
|------------------|------------------|----------------|-------------------------|-----------|-----------|
|                  |                  |                | X                       | Y         | Z         |
| 1                | 6                | 0              | -1.033390               | -0.120332 | -0.239873 |
| 2                | 6                | 0              | 0.391983                | -0.484970 | 0.137164  |
| 3                | 1                | 0              | 0.890352                | 0.098643  | 0.924048  |
| 4                | 8                | 0              | 0.721183                | -1.744791 | 0.117355  |
| 5                | 1                | 0              | -1.120512               | 0.951339  | -0.423480 |
| 6                | 1                | 0              | -1.720356               | -0.391121 | 0.564796  |
| 7                | 1                | 0              | -1.321195               | -0.663049 | -1.141148 |
| 8                | 8                | 0              | 1.686915                | -1.457837 | -1.430053 |
| 9                | 1                | 0              | 2.235027                | -1.983411 | -2.045793 |
| 10               | 1                | 0              | 1.120411                | -0.239186 | -0.869532 |

-----  
 Zero-point Energies= -229.967206 au

CH<sub>3</sub>-CHT(OOH):

Input orientation:

| Center<br>Number | Atomic<br>Number | Atomic<br>Type | Coordinates (Angstroms) |           |           |
|------------------|------------------|----------------|-------------------------|-----------|-----------|
|                  |                  |                | X                       | Y         | Z         |
| 1                | 6                | 0              | -1.116849               | -0.005871 | -0.270542 |
| 2                | 6                | 0              | 0.166025                | -0.693273 | 0.148929  |
| 3                | 1                | 0              | 0.636781                | -0.185240 | 0.995884  |
| 4                | 8                | 0              | 1.036427                | -0.626789 | -0.969637 |
| 5                | 1                | 0              | -0.920838               | 1.030576  | -0.547819 |
| 6                | 1                | 0              | -1.827206               | -0.016763 | 0.557573  |
| 7                | 1                | 0              | -1.569149               | -0.515941 | -1.122240 |
| 8                | 8                | 0              | 2.277005                | -1.193458 | -0.560429 |
| 9                | 1                | 0              | 2.383691                | -1.903053 | -1.204648 |
| 10               | 1                | 0              | -0.004386               | -1.741588 | 0.417028  |

Zero-point Energies= -230.058631 au

TS<sub>CH<sub>3</sub>-CHOH(OT)</sub>:

Input orientation:

| Center<br>Number | Atomic<br>Number | Atomic<br>Type | Coordinates (Angstroms) |           |           |
|------------------|------------------|----------------|-------------------------|-----------|-----------|
|                  |                  |                | X                       | Y         | Z         |
| 1                | 6                | 0              | -0.966836               | -0.094388 | -0.239552 |
| 2                | 6                | 0              | 0.514655                | -0.333693 | -0.235350 |
| 3                | 1                | 0              | 1.026436                | -0.002732 | 0.681949  |
| 4                | 8                | 0              | 1.176977                | -0.277842 | -1.356617 |
| 5                | 1                | 0              | -1.124511               | 0.976550  | -0.391714 |
| 6                | 1                | 0              | -1.428242               | -0.393795 | 0.701455  |
| 7                | 1                | 0              | -1.418183               | -0.633204 | -1.072479 |
| 8                | 8                | 0              | 0.691250                | -2.030499 | -0.141275 |
| 9                | 1                | 0              | 1.321138                | -2.313164 | 0.533728  |
| 10               | 1                | 0              | 1.208596                | -1.558734 | -1.070581 |

Zero-point Energies= -230.094450 au

CH<sub>3</sub>-CHOH(OT):

Input orientation:

| Center<br>Number | Atomic<br>Number | Atomic<br>Type | Coordinates (Angstroms) |           |           |
|------------------|------------------|----------------|-------------------------|-----------|-----------|
|                  |                  |                | X                       | Y         | Z         |
| 1                | 6                | 0              | -1.002411               | -0.111919 | -0.383923 |
| 2                | 6                | 0              | 0.493328                | -0.248376 | -0.148789 |
| 3                | 1                | 0              | 1.044635                | 0.514260  | -0.708572 |
| 4                | 8                | 0              | 0.989461                | -1.467822 | -0.600919 |
| 5                | 1                | 0              | -1.364878               | 0.867157  | -0.059248 |
| 6                | 1                | 0              | -1.535766               | -0.885991 | 0.174259  |
| 7                | 1                | 0              | -1.220669               | -0.226235 | -1.446094 |
| 8                | 8                | 0              | 0.803283                | -0.161789 | 1.230277  |
| 9                | 1                | 0              | 0.309980                | 0.564103  | 1.620452  |
| 10               | 1                | 0              | 0.674138                | -2.150188 | 0.001655  |

Zero-point Energies= -230.161980 au

TS<sub>CH<sub>2</sub>=CH(OT)</sub>:

Input orientation:

| Center<br>Number | Atomic<br>Number | Atomic<br>Type | Coordinates (Angstroms) |           |           |
|------------------|------------------|----------------|-------------------------|-----------|-----------|
|                  |                  |                | X                       | Y         | Z         |
| 1                | 6                | 0              | -1.014880               | -0.338865 | -0.471322 |
| 2                | 6                | 0              | 0.407549                | -0.277896 | -0.468032 |
| 3                | 1                | 0              | 0.969418                | 0.433414  | -1.058240 |
| 4                | 8                | 0              | 1.164335                | -1.287928 | -0.053127 |
| 5                | 1                | 0              | -0.804750               | 0.425836  | 0.641207  |
| 6                | 1                | 0              | -1.451498               | -1.313553 | -0.268510 |
| 7                | 1                | 0              | -1.515911               | 0.242190  | -1.235572 |
| 8                | 8                | 0              | 0.283144                | 0.968275  | 1.019972  |
| 9                | 1                | 0              | 0.743183                | 0.940251  | 1.868727  |
| 10               | 1                | 0              | 0.609513                | -1.954529 | 0.368214  |

Zero-point Energies= -230.061231 au

TS<sub>CH<sub>3</sub>-CT(OOH)-CH<sub>3</sub></sub>:

Input orientation:

| Center Number | Atomic Number | Atomic Type | Coordinates (Angstroms) |           |           |
|---------------|---------------|-------------|-------------------------|-----------|-----------|
|               |               |             | X                       | Y         | Z         |
| 1             | 6             | 0           | -1.096593               | -0.071366 | -0.111805 |
| 2             | 6             | 0           | 0.411318                | -0.302173 | -0.059782 |
| 3             | 6             | 0           | 1.158304                | 0.138334  | 1.196157  |
| 4             | 8             | 0           | 0.836184                | -1.404825 | -0.616002 |
| 5             | 1             | 0           | 2.230185                | 0.001266  | 1.053277  |
| 6             | 1             | 0           | -1.335928               | 0.974122  | 0.087366  |
| 7             | 1             | 0           | -1.591200               | -0.687517 | 0.644045  |
| 8             | 1             | 0           | -1.476755               | -0.348701 | -1.094945 |
| 9             | 1             | 0           | 0.836648                | -0.465377 | 2.049171  |
| 10            | 1             | 0           | 0.954314                | 1.186196  | 1.420734  |
| 11            | 8             | 0           | 1.559029                | -0.427739 | -2.013741 |
| 12            | 1             | 0           | 2.044955                | -0.607437 | -2.842815 |
| 13            | 1             | 0           | 0.890239                | 0.388516  | -0.996659 |

Zero-point Energies= -269.247868 au

CH<sub>3</sub>-CT(OOH)-CH<sub>3</sub>:

Input orientation:

| Center Number | Atomic Number | Atomic Type | Coordinates (Angstroms) |           |           |
|---------------|---------------|-------------|-------------------------|-----------|-----------|
|               |               |             | X                       | Y         | Z         |
| 1             | 6             | 0           | -1.075859               | -0.064344 | -0.086891 |
| 2             | 6             | 0           | 0.427239                | -0.213094 | -0.240413 |
| 3             | 6             | 0           | 1.188604                | 0.153250  | 1.022736  |
| 4             | 8             | 0           | 0.612556                | -1.586797 | -0.581674 |
| 5             | 1             | 0           | 2.259622                | 0.000352  | 0.887214  |
| 6             | 1             | 0           | -1.322391               | 0.974180  | 0.140733  |
| 7             | 1             | 0           | -1.435450               | -0.693463 | 0.730548  |
| 8             | 1             | 0           | -1.587642               | -0.355512 | -1.004505 |
| 9             | 1             | 0           | 0.842000                | -0.458921 | 1.859648  |
| 10            | 1             | 0           | 1.022631                | 1.204026  | 1.269736  |
| 11            | 8             | 0           | 1.972096                | -1.753142 | -0.974442 |
| 12            | 1             | 0           | 2.263826                | -2.440495 | -0.364668 |
| 13            | 1             | 0           | 0.782969                | 0.387661  | -1.085322 |

Zero-point Energies= -269.340275 au

TS<sub>CH<sub>3</sub>-COT(OH)-CH<sub>3</sub></sub>:

Input orientation:

| Center Number | Atomic Number | Atomic Type | Coordinates (Angstroms) |           |           |
|---------------|---------------|-------------|-------------------------|-----------|-----------|
|               |               |             | X                       | Y         | Z         |
| 1             | 6             | 0           | -1.144829               | -0.219447 | 0.029968  |
| 2             | 6             | 0           | 0.349919                | -0.398001 | -0.042282 |
| 3             | 6             | 0           | 1.116205                | -0.083047 | 1.221866  |
| 4             | 8             | 0           | 0.813246                | -1.352181 | -0.810471 |
| 5             | 1             | 0           | 2.188755                | -0.113204 | 1.026870  |
| 6             | 1             | 0           | -1.422694               | 0.735606  | 0.475505  |
| 7             | 1             | 0           | -1.539293               | -1.031773 | 0.646692  |
| 8             | 1             | 0           | -1.568685               | -0.307209 | -0.969108 |
| 9             | 1             | 0           | 0.887990                | -0.873648 | 1.941625  |
| 10            | 1             | 0           | 0.826672                | 0.875403  | 1.654604  |
| 11            | 8             | 0           | 0.825205                | 0.806385  | -1.208638 |
| 12            | 1             | 0           | 1.605626                | 1.306432  | -0.939622 |
| 13            | 1             | 0           | 1.083039                | -0.302217 | -1.506069 |

Zero-point Energies= -269.380704 au

CH<sub>3</sub>-COT(OH)-CH<sub>3</sub>:

Input orientation:

| Center<br>Number | Atomic<br>Number | Atomic<br>Type | Coordinates (Angstroms) |           |           |
|------------------|------------------|----------------|-------------------------|-----------|-----------|
|                  |                  |                | X                       | Y         | Z         |
| 1                | 6                | 0              | -1.173607               | -0.208793 | 0.089440  |
| 2                | 6                | 0              | 0.336192                | -0.185624 | -0.072947 |
| 3                | 6                | 0              | 1.064217                | -0.011682 | 1.257040  |
| 4                | 8                | 0              | 0.693720                | -1.394183 | -0.682891 |
| 5                | 1                | 0              | 2.143572                | -0.004430 | 1.089141  |
| 6                | 1                | 0              | -1.521722               | 0.717459  | 0.551765  |
| 7                | 1                | 0              | -1.471491               | -1.050379 | 0.716510  |
| 8                | 1                | 0              | -1.630904               | -0.314853 | -0.894178 |
| 9                | 1                | 0              | 0.815906                | -0.837633 | 1.924576  |
| 10               | 1                | 0              | 0.779412                | 0.925475  | 1.743045  |
| 11               | 8                | 0              | 0.732854                | 0.836042  | -0.981256 |
| 12               | 1                | 0              | 0.682898                | 1.688004  | -0.539837 |
| 13               | 1                | 0              | 1.595252                | -1.297804 | -1.006808 |

Zero-point Energies= -269.446164 au

TS<sub>CH<sub>2</sub>=COT-CH<sub>3</sub></sub>:

Input orientation:

| Center<br>Number | Atomic<br>Number | Atomic<br>Type | Coordinates (Angstroms) |           |           |
|------------------|------------------|----------------|-------------------------|-----------|-----------|
|                  |                  |                | X                       | Y         | Z         |
| 1                | 6                | 0              | -1.216729               | -0.138062 | 0.098820  |
| 2                | 6                | 0              | 0.220540                | -0.504421 | 0.192293  |
| 3                | 6                | 0              | 1.057846                | -0.127358 | 1.287997  |
| 4                | 8                | 0              | 0.588820                | -1.423469 | -0.674165 |
| 5                | 1                | 0              | 1.442733                | 0.857272  | 0.608438  |
| 6                | 1                | 0              | -1.376812               | 0.831175  | 0.563990  |
| 7                | 1                | 0              | -1.797234               | -0.899944 | 0.630541  |
| 8                | 1                | 0              | -1.528565               | -0.109935 | -0.942817 |
| 9                | 1                | 0              | 1.879282                | -0.806121 | 1.504455  |
| 10               | 1                | 0              | 0.524361                | 0.228844  | 2.163048  |
| 11               | 8                | 0              | 1.072367                | 1.258359  | -0.657939 |
| 12               | 1                | 0              | 1.167563                | 1.889787  | -1.378568 |
| 13               | 1                | 0              | 1.536206                | -1.589760 | -0.594438 |

Zero-point Energies= -269.348444 au

TS<sub>CH<sub>3</sub>-CT(OOH)-OH</sub>:

Input orientation:

| Center<br>Number | Atomic<br>Number | Atomic<br>Type | Coordinates (Angstroms) |           |           |
|------------------|------------------|----------------|-------------------------|-----------|-----------|
|                  |                  |                | X                       | Y         | Z         |
| 1                | 6                | 0              | 0.183482                | -0.686858 | 0.075611  |
| 2                | 8                | 0              | 1.027803                | -0.318448 | -0.824909 |
| 3                | 8                | 0              | 0.960849                | -2.035076 | -1.581958 |
| 4                | 1                | 0              | 1.363924                | -2.497394 | -2.342904 |
| 5                | 6                | 0              | 0.596297                | -0.548165 | 1.538601  |
| 6                | 1                | 0              | 1.605555                | -0.933658 | 1.666460  |
| 7                | 1                | 0              | 0.298430                | -1.892105 | -0.210286 |
| 8                | 1                | 0              | -0.101062               | -1.100306 | 2.165216  |
| 9                | 1                | 0              | 0.563735                | 0.507620  | 1.810828  |
| 10               | 8                | 0              | -1.149409               | -0.331497 | -0.110413 |



11 1 0 -1.301005 -0.261814 -1.059746

-----  
Zero-point Energies= -305.193379 au

CH<sub>3</sub>-CT(OOH)-OH:

Input orientation:

| Center<br>Number | Atomic<br>Number | Atomic<br>Type | Coordinates (Angstroms) |           |           |
|------------------|------------------|----------------|-------------------------|-----------|-----------|
|                  |                  |                | X                       | Y         | Z         |
| 1                | 6                | 0              | 0.300672                | -0.841999 | 0.003870  |
| 2                | 8                | 0              | 1.061545                | 0.118131  | -0.710870 |
| 3                | 8                | 0              | 0.871081                | -0.176484 | -2.094399 |
| 4                | 1                | 0              | 0.613583                | 0.689172  | -2.432447 |
| 5                | 6                | 0              | 0.588348                | -0.580086 | 1.473207  |
| 6                | 1                | 0              | 1.063579                | -1.441019 | 1.940659  |
| 7                | 1                | 0              | 0.636393                | -1.829331 | -0.332352 |
| 8                | 1                | 0              | -0.349307               | -0.366581 | 1.983916  |
| 9                | 1                | 0              | 1.250662                | 0.280268  | 1.573406  |
| 10               | 8                | 0              | -1.064379               | -0.692587 | -0.241125 |
| 11               | 1                | 0              | -1.228676               | -0.950084 | -1.153565 |

-----  
Zero-point Energies= -305.284183 au

TS<sub>CH<sub>3</sub>-COT(OH)<sub>2</sub></sub>:

Input orientation:

| Center<br>Number | Atomic<br>Number | Atomic<br>Type | Coordinates (Angstroms) |           |           |
|------------------|------------------|----------------|-------------------------|-----------|-----------|
|                  |                  |                | X                       | Y         | Z         |
| 1                | 6                | 0              | -0.716954               | -1.259901 | -0.229827 |
| 2                | 6                | 0              | 0.534666                | -1.356855 | 0.586524  |
| 3                | 8                | 0              | 1.807871                | -1.106786 | -0.604147 |
| 4                | 8                | 0              | 1.065171                | -2.509372 | 0.894256  |
| 5                | 1                | 0              | 2.408965                | -0.391668 | -0.366382 |
| 6                | 1                | 0              | -0.889012               | -0.233846 | -0.549487 |
| 7                | 1                | 0              | -1.544454               | -1.585946 | 0.403868  |
| 8                | 1                | 0              | -0.637452               | -1.919006 | -1.090516 |
| 9                | 1                | 0              | 1.884293                | -2.126420 | 0.047488  |
| 10               | 8                | 0              | 0.631115                | -0.373649 | 1.506092  |
| 11               | 1                | 0              | 1.231590                | -0.696204 | 2.190924  |

-----  
Zero-point Energies= -305.341949 au

CH<sub>3</sub>-COT(OH)<sub>2</sub>:

Input orientation:

| Center<br>Number | Atomic<br>Number | Atomic<br>Type | Coordinates (Angstroms) |           |           |
|------------------|------------------|----------------|-------------------------|-----------|-----------|
|                  |                  |                | X                       | Y         | Z         |
| 1                | 6                | 0              | -0.751889               | -1.279889 | -0.219556 |
| 2                | 6                | 0              | 0.574988                | -1.318748 | 0.495912  |
| 3                | 8                | 0              | 1.566003                | -0.936060 | -0.418511 |
| 4                | 8                | 0              | 0.782621                | -2.630421 | 0.943980  |
| 5                | 1                | 0              | 2.432117                | -0.939331 | 0.000486  |
| 6                | 1                | 0              | -0.933493               | -0.266254 | -0.572064 |
| 7                | 1                | 0              | -1.536283               | -1.579130 | 0.473121  |
| 8                | 1                | 0              | -0.719035               | -1.966531 | -1.063352 |
| 9                | 1                | 0              | 1.623617                | -2.700117 | 1.406317  |
| 10               | 8                | 0              | 0.508317                | -0.422918 | 1.571520  |
| 11               | 1                | 0              | 1.341737                | -0.410202 | 2.052246  |

Zero-point Energies= -305.391573 au

TS2<sub>CH3COOT</sub>:

Input orientation:

| Center<br>Number | Atomic<br>Number | Atomic<br>Type | Coordinates (Angstroms) |           |           |
|------------------|------------------|----------------|-------------------------|-----------|-----------|
|                  |                  |                | X                       | Y         | Z         |
| 1                | 8                | 0              | -0.978090               | 2.138169  | 0.075191  |
| 2                | 1                | 0              | -1.440287               | 2.483627  | -0.693352 |
| 3                | 1                | 0              | 0.078962                | 1.690904  | -0.175539 |
| 4                | 6                | 0              | -0.995979               | -0.439694 | 0.104723  |
| 5                | 6                | 0              | 0.370288                | -0.189484 | 0.329655  |
| 6                | 8                | 0              | 1.048074                | -0.964494 | 1.174057  |
| 7                | 8                | 0              | 0.981228                | 0.830160  | -0.130565 |
| 8                | 1                | 0              | 1.897297                | -0.534660 | 1.343070  |
| 9                | 1                | 0              | -1.424806               | -1.273223 | 0.644025  |
| 10               | 1                | 0              | -1.290333               | -0.364473 | -0.938944 |
| 11               | 1                | 0              | -1.305953               | 1.040667  | 0.273476  |

Zero-point Energies= -305.348550 au
